# Supplementary figures and images for: Pro-Angiogenetic Effects of Purified Extracts from Helix aspersa during Zebrafish Development
Source: MDPI journal article supplement (doi:10.3390/cimb44080232), 2022-07-27

Figure S1

Dose curve 48 hpf

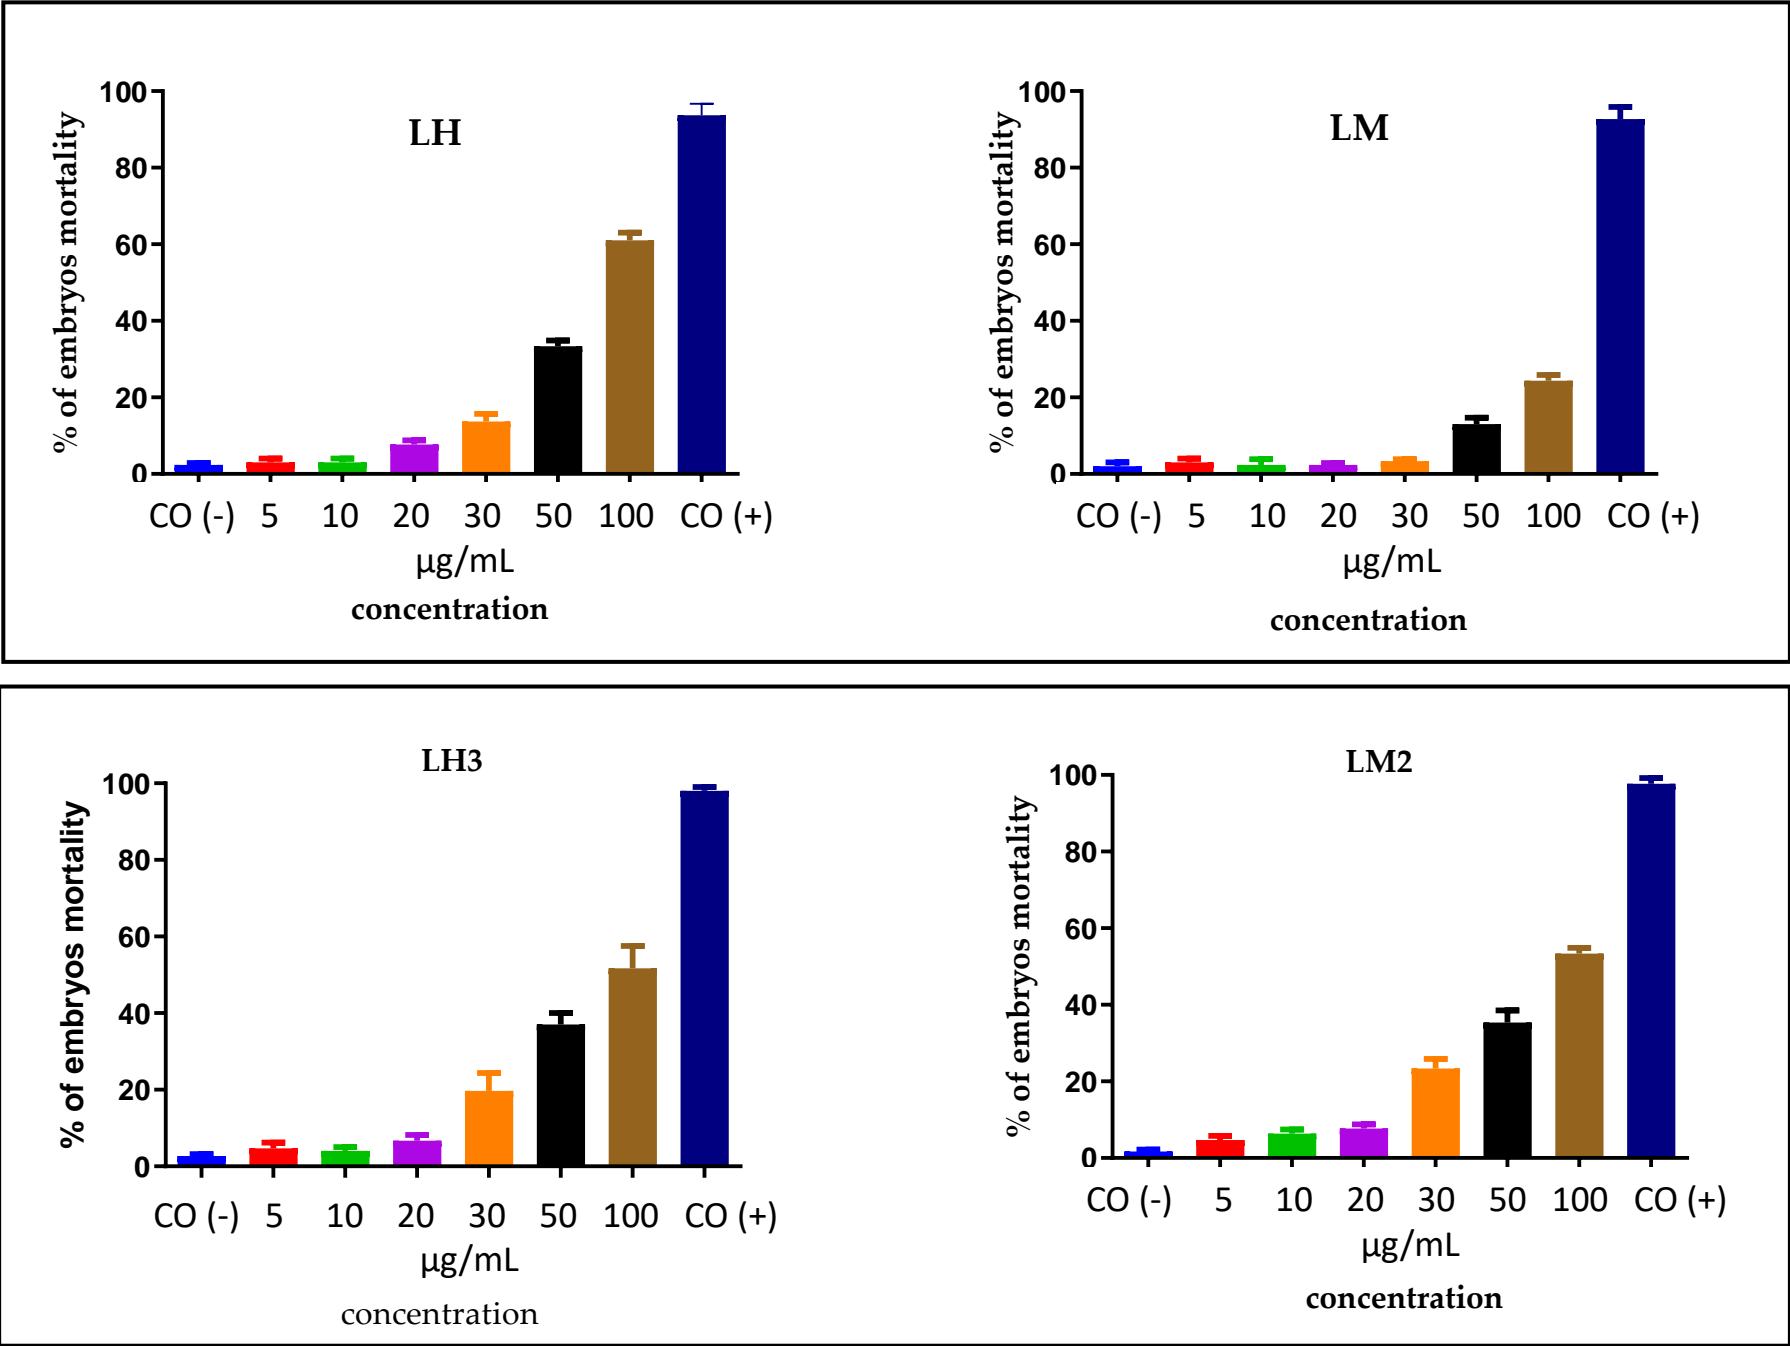

Supplement: s1 [file s1]
